# Supplementary material for: Contribution of intracranial artery stenosis to white matter hyperintensities progression in elderly Chinese patients: A 3-year retrospective longitudinal study
Source: Frontiers journal article supplement (doi:10.3389/fneur.2022.922320), 2022-09-23
Supplement: Table_4.DOCX [file Table_4.DOCX]

| **Table 4** **Risk for** **progression of PVWMHs and SCWMHs associated with ICAS severity at baseline** | | | | | | | | | | | |
| --- | --- | --- | --- | --- | --- | --- | --- | --- | --- | --- | --- |
|  | Risk for PVWMHs progression | | | | |  | Risk for SCWMHs progression | | | | |
|  | Unadjusted | |  | Adjusted* | |  | Unadjusted | |  | Adjusted* | |
|  | OR (95% CI) | *p* |  | OR (95% CI) | *p* |  | OR (95% CI) | *p* |  | OR (95% CI) | *p* |
| Baseline PVWMHs | 3.10 (2.30-4.17) | <0.001 |  | 2.64 (1.94-3.62) | <0.001 |  | - | - |  | - | - |
| Baseline SCWMHs | - | - |  | - | - |  | 3.44 (2.53-4.67) | <0.001 |  | 3.08 (2.24-4.22) | <0.001 |
| ICAS |  |  |  |  |  |  |  |  |  |  |  |
| Grade 1 | 1.00 (reference) | - |  | 1.00 (reference) |  |  | 1.00 (reference) |  |  | 1.00 (reference) |  |
| Grade 2 | 3.81 (2.12-2.90) | <0.001 |  | 2.31 (1.21-4.39) | 0.011 |  | 2.83 (1.58-5.05) | <0.001 |  | 1.92 (1.01-3.68) | 0.048 |
| Grade 3 | 5.63 (2.90-10.9) | <0.001 |  | 2.50 (1.18-5.32) | 0.017 |  | 5.35 (2.77-10.3) | <0.001 |  | 2.47 (1.14-5.34) | 0.022 |
| PVWMHs, periventricular white matter hyperintensities; SCWMHs, subcortical white matter hyperintensities; ICAS, intracranial atherosclerotic stenosis.  *Adjusted for age, sex, vascular risk factors (e.g., hypertension, diabetes, coronary heart disease, dyslipidaemia, previous stroke, current smoking and daily alcohol use) and baseline PVWMHs and SCWMHs (measured by Fazekas scores), respectively.  Progression for PVWMHs and SCWMHs, increase in one point or more on the PVWMHs and SCWMHs part of modified Rotterdam Progression sc scale (mRPS), respectively. | | | | | | | | | | | |
